# Supplementary material for: ESD Ideas: Translating historical extreme weather events into a warmer world
Source: Copernicus journal article supplement (doi:10.5194/esd-14-1081-2023), 2023-10-18
Supplement: Supplementary file 1 [file esd-14-1081-2023-supplement.zip]

Archive with 2 entries (2 files):
- ulysses_warmer.gif
- esd-14-1081-2023-supplement-title-page.pdf
