# Supplementary material for: ESD Ideas: Translating historical extreme weather events into a warmer world
Source: Copernicus journal article supplement (doi:10.5194/esd-14-1081-2023), 2023-10-18
Supplement: Supplementary file 1 [file esd-14-1081-2023-supplement.zip › esd-14-1081-2023-supplement-title-page.pdf]

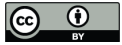

*Supplement of*

## **ESD Ideas: Translating historical extreme weather events into a warmer world**

**Ed Hawkins et al.**

*Correspondence to:* Ed Hawkins ([ed.hawkins@ncas.ac.uk](mailto:ed.hawkins@ncas.ac.uk))

- [esd-14-1081-2023-supplement-title-page.pdf](#)
- [ulysses\\_warmer.gif](#)

The copyright of individual parts of the supplement might differ from the article licence.
