# Supplementary figures and images for: ESD Ideas: Translating historical extreme weather events into a warmer world
Source: Copernicus journal article supplement (doi:10.5194/esd-14-1081-2023), 2023-10-18

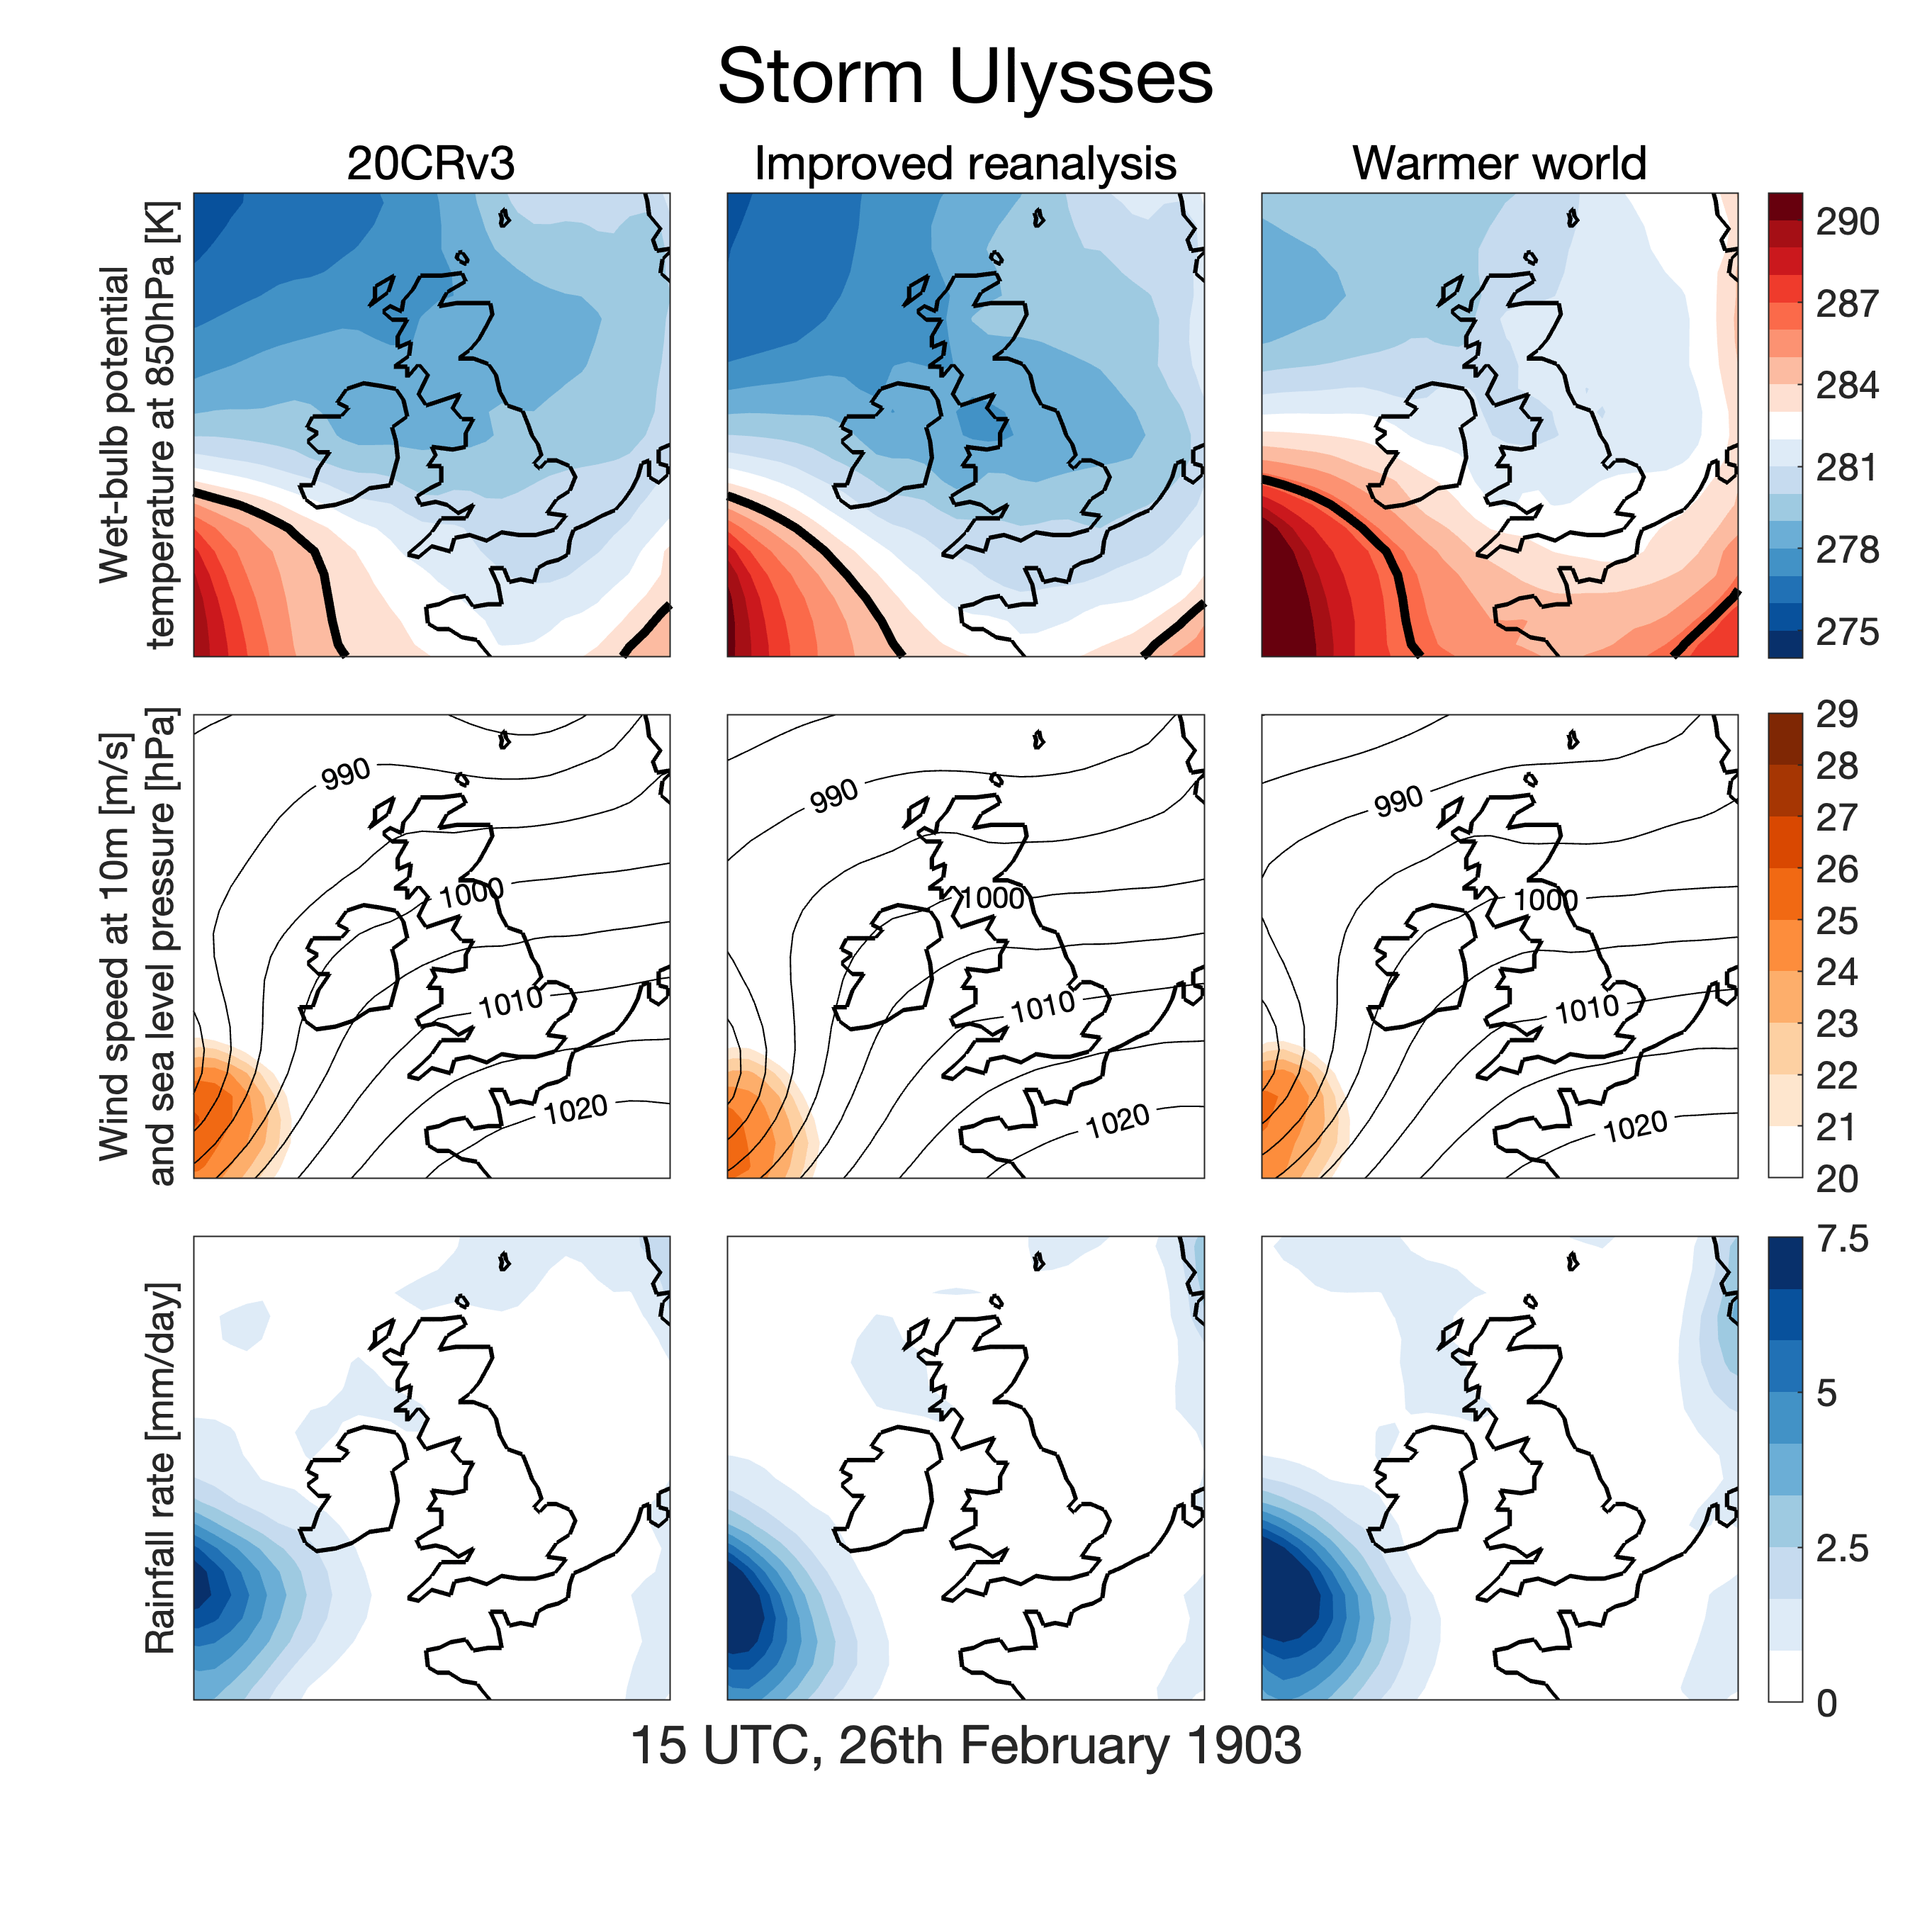

Supplement: Supplementary file 1 [file esd-14-1081-2023-supplement.zip › ulysses_warmer.gif]
